# Supplementary material for: Progeny Selection to Develop a Sustainable Arabica Coffee Cultivar
Source: MDPI journal article supplement (doi:10.3390/agronomy12051144), 2022-05-09
Supplement: s1 [file s1]

Archive with 1 entries (1 files):
- agronomy-1619463-supplementary.pdf
