# Supplementary material for: Progeny Selection to Develop a Sustainable Arabica Coffee Cultivar
Source: MDPI journal article supplement (doi:10.3390/agronomy12051144), 2022-05-09
Supplement: s1 [file s1 › agronomy-1619463-supplementary.pdf]

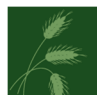

**Table S1.** F<sub>4:5</sub> progenies evaluated in the experiments set up at the experimental field of EPAMIG in São Sebastião do Paraíso.

| Treat. | Progeny/Cultivar                | Treat. | Progeny/Cultivar              | Treat. | Progeny/Cultivars              |
|--------|---------------------------------|--------|-------------------------------|--------|--------------------------------|
| P1     | H 29-1-8-5 (I.5) plant 1        | P24    | H 32-3-15-20 (I.13) plant 1   | P47    | H 136-1-14-10 (I.22) plant 3   |
| P2     | H 29-1-8-5 (I.5) plant 3        | P25    | H 32-3-15-20 (I.13) plant 5   | P48    | H 30-3-14-1-19 (II.12) plant 1 |
| P3     | H 29-1-8-5 (I.5) plant 4        | P26    | H 32-11-17-4 (I.4) plant 2    | P49    | H 30-3-14-1-19 (II.12) plant 4 |
| P4     | H 29-1-8-5 (I.5) plant 5        | P27    | H 136-1-19-4 (II.27) plant 1  | P50    | H 32-3-15-20 (II.13) plant 1   |
| P5     | H 29-1-9-8 (II.7) plant 1       | P28    | H 136-1-19-4 (II.27) plant 2  | P51    | H 32-3-15-20 (II.13) plant 3   |
| P6     | H 29-1-9-8 (II.7) plant 4       | P29    | H 136-1-19-4 (II.27) plant 3  | P52    | H 32-3-15-20 (II.13) plant 4   |
| P7     | H 136-1-14-14 (II.23) plant 1   | P30    | H 136-1-19-4 (II.27) plant 5  | P53    | H 32-3-15-20 (II.13) plant 5   |
| P8     | H 29-1-3-12 (III.2) plant 3     | P31    | H 29-1-8-16 (II.6) plant 3    | P54    | H 29-1-14-5 (III.8) plant 2    |
| P9     | H 29-1-3-12 (III.2) plant 5     | P32    | H 29-1-8-16 (II.6) plant 4    | P55    | H 29-1-14-5 (III.8) plant 3    |
| P10    | H 32-11-17-4 (III.4) plant 1    | P33    | H 29-1-8-16 (II.6) plant 5    | P56    | H 29-1-14-5 (III.8) plant 4    |
| P11    | H 32-11-17-4 (III.4) plant 2    | P34    | H 136-1-19-7 (II.28) plant 2  | P57    | H 29-1-14-5 (III.8) plant 5    |
| P12    | H 32-11-17-4 (III.4) plant 5    | P35    | H 29-1-8-5 (III.5) plant 2    | P58    | Rubi 1192 (III.30) plant 1     |
| P13    | H 29-1-8-16 (I.6) plant 1       | P36    | H 29-1-8-5 (III.5) plant 3    | P59    | Rubi 1192 (III.30) plant 2     |
| P14    | H 29-1-8-16 (I.6) plant 4       | P37    | H 29-1-8-5 (III.5) plant 4    | P60    | Rubi 1192 (III.30) plant 5     |
| P15    | H 29-1-9-8 (I.7) plant 1        | P38    | H 29-1-8-5 (II.5) plant 4     | P61    | H 136-1-19-4 (I.27) plant 1    |
| P16    | H 29-1-9-8 (I.7) plant 3        | P39    | H 136-1-19-7 (III.28) plant 1 | P62    | H 136-1-19-4 (I.27) plant 2    |
| P17    | H 29-1-9-8 (I.7) plant 5        | P40    | H 136-1-19-7 (III.28) plant 2 | P63    | H 136-1-19-4 (I.27) plant 3    |
| P18    | H 29-1-14-5 (I.8) plant 3       | P41    | H 136-1-19-7 (III.28) plant 4 | P64    | H 136-1-19-4 (I.27) plant 4    |
| P19    | H 136-1-4-3 (II.29) plant 4     | P42    | H 136-1-19-7 (III.28) plant 5 | P65    | H 136-1-19-4 (I.27) plant 5    |
| P20    | H 136-1-14-10 (III.22) plant 2  | P43    | H 29-1-8-16 (III.16) plant 1  | P66    | H 136-1-19-7 (I.28) plant 1    |
| P21    | H 30-3-14-1-19 (III.12) plant 1 | P44    | H 29-1-8-16 (III.16) plant 3  | P67    | H 136-1-19-7 (I.28) plant 4    |
| P22    | H 30-3-14-1-19 (III.12) plant 3 | P45    | H 136-1-19-4 (II.27) plant 4  | P68    | H 29-1-9-8 (III.7) plant 1     |
| P23    | H 30-3-14-1-19 (III.12) plant 5 | P46    | H 136-1-14-10 (I.22) plant 1  |        |                                |

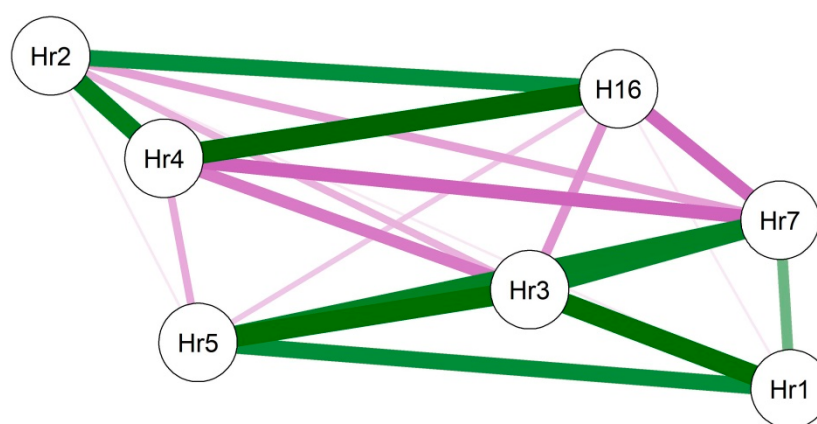

**Figure S1.** Correlation network of the seven evaluated harvests.
